# Supplementary material for: The ArcAB two-component regulatory system promotes resistance to reactive oxygen species and systemic infection by Salmonella Typhimurium
Source: PubMed Central journal article supplement (PMC6122832; doi:10.1371/journal.pone.0203497), 2018-09-04
Supplement: pone.0203497.s010.pdf [file pone.0203497.s010.pdf]

## Supplementary Table 1. Primers used for qPCR

| <b>gene</b> | <b>Primer Forward, sequence (5'-3')</b> | <b>Primer Reverse, sequence (5'-3')</b> |
|-------------|-----------------------------------------|-----------------------------------------|
| <i>sipC</i> | TGAACGGGCAGAATAGCGTCAA                  | AGCCTGATGTTTCAGGGGAGATTTG               |
| <i>hilA</i> | GTGAAGGGATTATCGCAGTA                    | CGTAATTGATCCATGAGCTC                    |
| <i>sodA</i> | ATGCTAACACAGCCTGTTCTGGA                 | ACAGCCAGTTTGTTCGCCTTTCA                 |
| <i>sodB</i> | AACCACACCTTCTACTGGAAGTGC                | CCAGTTTGGCCATCAGCGCTTTT                 |
| <i>sodC</i> | ATGGTCTTACGCCAGGAATTCACG                | ATCTGCATTGACAACCAGTCCAGG                |
| <i>katE</i> | ATTCCGGAAGAGTTGGTGCCAGTA                | GACGACTGATTTGCGTGTCCGGTAT               |
| <i>katG</i> | TAACTCCTGGCCGGATAAC                     | TAATCGGCCACAACAAACG                     |
| <i>katN</i> | GCGCGAGCGAAGATCATTAT                    | GCGACTTCACGGGTCATTAAGA                  |
| <i>ahpC</i> | TTTGTGTTGCCCGACTGAACTGG                 | TGTGCGTGAAGTGAGTATCGGT                  |
| <i>ahpF</i> | GGCTATCGATCTGGCAGGTATTGT                | TACGCACTTTGTCCTGTAGCA                   |
| <i>ompC</i> | TACCGTAACACCGACTTCTT                    | GGTTGCGTTATAGGTCTGAG                    |
| <i>ompD</i> | TGCCACCTACCGTAACACT                     | TTAGACTCGTACGCGCCG                      |
| <i>ompF</i> | CACGGCTGGTCATGTAGTTA                    | AATCTGGTCCGTCTGGCTTT                    |
| <i>ompW</i> | ATGAAAAAATTTACAGTGG                     | GAAACGATAGCCTGCCGA                      |
| <i>manZ</i> | GGTATCAAAGTCGGTCTGATGGGA                | GGTAGCCATAAGCCACGCCATAAT                |
| <i>pgI</i>  | ACGTGGCGAAACACTTTGCT                    | TTGTCGAAACCGACGGACAGAA                  |
| <i>pmgI</i> | ACCGGAAATGAGCTCTGCAGAA                  | CAACGGACTCAACCGCTTTTGT                  |
| <i>fbaB</i> | AATCGTAGCGGCCAGATGGTTG                  | TTTCGGTTCGGAACAGTCTCGT                  |
| <i>talB</i> | ACTATGCGCCAGCTGAAGAT                    | TCGCTTTCCGCCAGTTCTTT                    |
| <i>16s</i>  | TACCTGGTCTTGACATCCAC                    | TTATCACTGGCAGTCTCCTT                    |
| <i>arcA</i> | GGCTATGATGTATTCGAAGC                    | CCGTTGAACTTGTAGCTTTC                    |
| <i>arcB</i> | GTGCAAAAGCTGGAGGAGAT                    | CTCTTGCCGGTTAGCAATTC                    |
